# Supplementary material for: Brief communication: Rare ambient saturation during drifting snow occurrences at a coastal location of East Antarctica
Source: Copernicus journal article supplement (doi:10.5194/tc-13-3405-2019), 2019-12-19
Supplement: Supplementary file 1 [file tc-13-3405-2019-supplement.pdf]

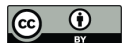

## *Supplement of*

# **Brief communication: Rare ambient saturation during drifting snow occurrences at a coastal location of East Antarctica**

**Charles Amory and Christoph Kittel**

*Correspondence to:* Charles Amory ([charles.amory@uliege.be](mailto:charles.amory@uliege.be))

The copyright of individual parts of the supplement might differ from the CC BY 4.0 License.

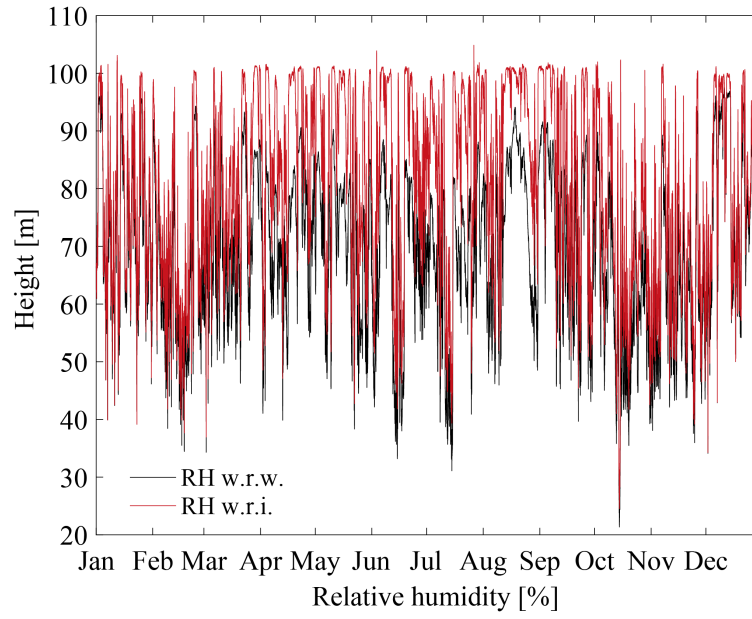

**Figure S1.** Timeserie of raw (given with respect to water; w.r.w.) and converted (given with respect to ice; w.r.i.) RH values at 2 m height showing the regular occurrence of  $RH > 100\%$  due to limitations of the Goff-Gratch formulae used in the conversion.

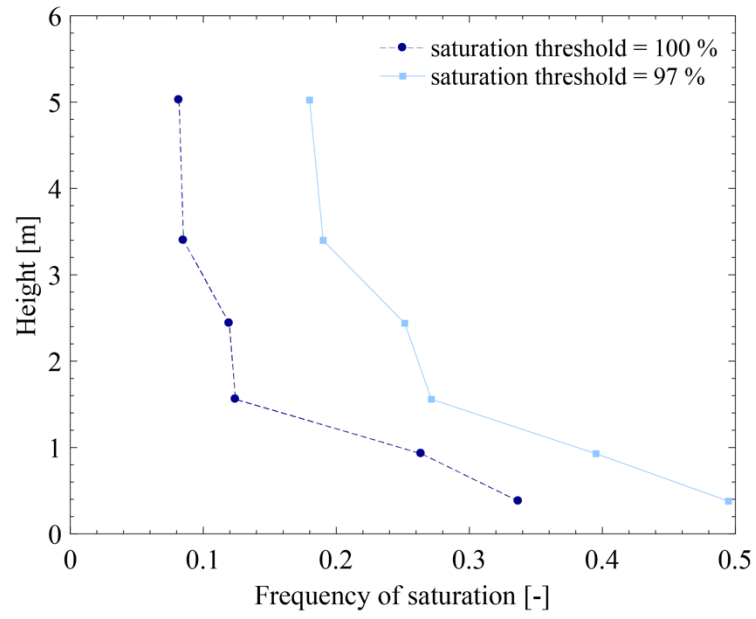

**Figure S2.** Frequency of saturation in drift conditions at each measurement level assuming that saturation is reached at 100 % (dashed line) and 97 % (solid line). Yearly average instrument heights are used.
